# Supplementary material for: Improving DNA aptamers against a heart failure protein biomarker using structure-guided random mutation approaches for colourimetric biosensor development
Source: Royal Society of Chemistry journal article supplement (doi:10.1039/d4me00073k), 2024-01-01
Supplement: d4me00073k2.pdf [file d4me00073k2.pdf]

**Table S1.** Additional NT-proBNP protein structure validation results.

| Code Name            | Galaxy Web Server |               |                     | MolProbity Server         |   |         |     |         |     |           |      |            |      | SAVESv6.0   | Deep UMQA                  |             |
|----------------------|-------------------|---------------|---------------------|---------------------------|---|---------|-----|---------|-----|-----------|------|------------|------|-------------|----------------------------|-------------|
|                      | MolProbity Score  | Poor Rotamers | Rama Favored Region | Ramachandran plot regions |   |         |     |         |     | Bad bonds |      | Bad angles |      | ERRAT Score | Rama Most Favoured Regions | Global IDDT |
|                      |                   |               |                     | Outliers                  |   | Allowed |     | Favored |     | N         | %    | N          | %    |             |                            |             |
|                      |                   |               |                     | N                         | % | N       | %   | N       | %   |           |      |            |      |             |                            |             |
| AlphaFold2 (2-R1_05) | 0.5               | 0             | 100                 | 0                         | 0 | 74      | 100 | 74      | 100 | 3 / 606   | 0.50 | 3 / 819    | 0.37 | 100         | 98.4                       | 61.65       |
| trRosetta (1-R1_02)  | 0.5               | 0             | 100                 | 0                         | 0 | 74      | 100 | 74      | 100 | 6 / 606   | 0.99 | 9 / 819    | 1.10 | 85.7143     | 98.4                       | 54.02       |
| AlphaFold2 (1-R2_03) | 0.5               | 0             | 100                 | 0                         | 0 | 74      | 100 | 74      | 100 | 0 / 606   | 0    | 5 / 819    | 0.61 | 100         | 100                        | 61.62       |
| AlphaFold2 (1-R2_04) | 0.5               | 0             | 100                 | 0                         | 0 | 74      | 100 | 74      | 100 | 0 / 606   | 0    | 4 / 819    | 0.49 | 92.5373     | 98.4                       | 62.95       |
| AlphaFold2 (2-R2_01) | 0.5               | 0             | 100                 | 0                         | 0 | 74      | 100 | 74      | 100 | 0 / 606   | 0    | 4 / 819    | 0.49 | 98.5294     | 96.7                       | 61.48       |
| AlphaFold2 (2-R2_05) | 0.5               | 0             | 100                 | 0                         | 0 | 74      | 100 | 74      | 100 | 0 / 606   | 0    | 3 / 819    | 0.37 | 100         | 96.7                       | 60.11       |
| AlphaFold2 (2-R2_09) | 0.5               | 0             | 100                 | 0                         | 0 | 74      | 100 | 74      | 100 | 0 / 606   | 0    | 4 / 819    | 0.49 | 98.5294     | 98.4                       | 61.81       |
| AlphaFold2 (3-R2_02) | 0.5               | 0             | 100                 | 0                         | 0 | 74      | 100 | 74      | 100 | 0 / 606   | 0    | 4 / 819    | 0.49 | 100         | 100                        | 57.96       |
| AlphaFold2 (3-R2_04) | 0.5               | 0             | 100                 | 0                         | 0 | 74      | 100 | 74      | 100 | 0 / 606   | 0    | 4 / 819    | 0.49 | 100         | 100                        | 59.55       |
| AlphaFold2 (3-R2_06) | 0.5               | 0             | 100                 | 0                         | 0 | 74      | 100 | 74      | 100 | 0 / 606   | 0    | 4 / 819    | 0.49 | 100         | 100                        | 59.05       |
| AlphaFold2 (3-R2_07) | 0.5               | 0             | 100                 | 0                         | 0 | 74      | 100 | 74      | 100 | 0 / 606   | 0    | 4 / 819    | 0.49 | 100         | 100                        | 61.02       |
| AlphaFold2 (3-R2_08) | 0.5               | 0             | 100                 | 0                         | 0 | 74      | 100 | 74      | 100 | 0 / 606   | 0    | 5 / 819    | 0.61 | 100         | 100                        | 62.23       |
| AlphaFold2 (4-R2_09) | 0.5               | 0             | 100                 | 0                         | 0 | 74      | 100 | 74      | 100 | 0 / 606   | 0    | 3 / 819    | 0.37 | 95.5224     | 98.4                       | 57.09       |
| AlphaFold2 (5-R2_07) | 0.5               | 0             | 100                 | 0                         | 0 | 74      | 100 | 74      | 100 | 0 / 606   | 0    | 4 / 819    | 0.49 | 100         | 100                        | 59.08       |
| AlphaFold2 (5-R2_08) | 0.5               | 0             | 100                 | 0                         | 0 | 74      | 100 | 74      | 100 | 0 / 606   | 0    | 4 / 819    | 0.49 | 100         | 100                        | 60.64       |
| trRosetta (1-R2_02)  | 0.5               | 0             | 100                 | 0                         | 0 | 74      | 100 | 74      | 100 | 0 / 606   | 0    | 7 / 819    | 0.85 | 90.7692     | 96.7                       | 64.81       |
| trRosetta (1-R2_04)  | 0.5               | 0             | 100                 | 0                         | 0 | 74      | 100 | 74      | 100 | 0 / 606   | 0    | 7 / 819    | 0.85 | 89.0625     | 96.7                       | 67.33       |
| trRosetta (1-R2_08)  | 0.5               | 0             | 100                 | 0                         | 0 | 74      | 100 | 74      | 100 | 0 / 606   | 0    | 5 / 819    | 0.61 | 86.3636     | 96.7                       | 66.10       |
| trRosetta (3-R2_01)  | 0.5               | 0             | 100                 | 0                         | 0 | 74      | 100 | 74      | 100 | 0 / 606   | 0    | 3 / 819    | 0.37 | 90.9091     | 91.8                       | 61.98       |
| Robetta (1-R2_02)    | 0.5               | 0             | 100                 | 0                         | 0 | 74      | 100 | 74      | 100 | 0 / 606   | 0    | 4 / 819    | 0.49 | 100         | 98.4                       | 69.98       |
| Robetta (1-R2_04)    | 0.5               | 0             | 100                 | 0                         | 0 | 74      | 100 | 74      | 100 | 0 / 606   | 0    | 4 / 819    | 0.49 | 100         | 100                        | 61.46       |
| Robetta (1-R2_07)    | 0.5               | 0             | 100                 | 0                         | 0 | 74      | 100 | 74      | 100 | 0 / 606   | 0    | 4 / 819    | 0.49 | 100         | 100                        | 61.58       |

| Code Name         | Galaxy Web Server |               |                     | MolProbity Server         |   |         |     |         |     |           |   |            |      | SAVESv6.0   | Deep UMQA                  |             |
|-------------------|-------------------|---------------|---------------------|---------------------------|---|---------|-----|---------|-----|-----------|---|------------|------|-------------|----------------------------|-------------|
|                   | MolProbity Score  | Poor Rotamers | Rama Favored Region | Ramachandran plot regions |   |         |     |         |     | Bad bonds |   | Bad angles |      | ERRAT Score | Rama Most Favoured Regions | Global IDDT |
|                   |                   |               |                     | Outliers                  |   | Allowed |     | Favored |     | N         | % | N          | %    |             |                            |             |
|                   |                   |               |                     | N                         | % | N       | %   | N       | %   |           |   |            |      |             |                            |             |
| Robetta (2-R2_01) | 0.5               | 0             | 100                 | 0                         | 0 | 74      | 100 | 74      | 100 | 0 / 606   | 0 | 5 / 819    | 0.61 | 100         | 100                        | 63.18       |
| Robetta (2-R2_02) | 0.5               | 0             | 100                 | 0                         | 0 | 74      | 100 | 74      | 100 | 0 / 606   | 0 | 6 / 819    | 0.73 | 100         | 98.4                       | 60.29       |
| Robetta (2-R2_03) | 0.5               | 0             | 100                 | 0                         | 0 | 74      | 100 | 74      | 100 | 0 / 606   | 0 | 6 / 819    | 0.73 | 100         | 100                        | 60.19       |
| Robetta (2-R2_04) | 0.5               | 0             | 100                 | 0                         | 0 | 74      | 100 | 74      | 100 | 0 / 606   | 0 | 6 / 819    | 0.73 | 98.5294     | 100                        | 59.67       |
| Robetta (2-R2_05) | 0.5               | 0             | 100                 | 0                         | 0 | 74      | 100 | 74      | 100 | 0 / 606   | 0 | 4 / 819    | 0.49 | 100         | 100                        | 63.31       |
| Robetta (2-R2_07) | 0.5               | 0             | 100                 | 0                         | 0 | 74      | 100 | 74      | 100 | 0 / 606   | 0 | 6 / 819    | 0.73 | 100         | 98.4                       | 60.76       |
| Robetta (2-R2_08) | 0.5               | 0             | 100                 | 0                         | 0 | 74      | 100 | 74      | 100 | 0 / 606   | 0 | 4 / 819    | 0.49 | 100         | 100                        | 70.46       |
| Robetta (2-R2_09) | 0.5               | 0             | 100                 | 0                         | 0 | 74      | 100 | 74      | 100 | 0 / 606   | 0 | 6 / 819    | 0.73 | 100         | 98.4                       | 60.86       |
| Robetta (2-R2_10) | 0.5               | 0             | 100                 | 0                         | 0 | 74      | 100 | 74      | 100 | 0 / 606   | 0 | 4 / 819    | 0.49 | 100         | 100                        | 65.36       |
| Robetta (3-R2_01) | 0.5               | 0             | 100                 | 0                         | 0 | 74      | 100 | 74      | 100 | 0 / 606   | 0 | 5 / 819    | 0.61 | 100         | 98.4                       | 60.42       |
| Robetta (3-R2_02) | 0.5               | 0             | 100                 | 0                         | 0 | 74      | 100 | 74      | 100 | 0 / 606   | 0 | 4 / 819    | 0.49 | 100         | 100                        | 58.77       |
| Robetta (3-R2_03) | 0.5               | 0             | 100                 | 0                         | 0 | 74      | 100 | 74      | 100 | 0 / 606   | 0 | 5 / 819    | 0.61 | 98.5294     | 98.4                       | 59.59       |
| Robetta (3-R2_04) | 0.5               | 0             | 100                 | 0                         | 0 | 74      | 100 | 74      | 100 | 0 / 606   | 0 | 5 / 819    | 0.61 | 95.5882     | 98.4                       | 61.18       |
| Robetta (3-R2_06) | 0.5               | 0             | 100                 | 0                         | 0 | 74      | 100 | 74      | 100 | 0 / 606   | 0 | 7 / 819    | 0.85 | 100         | 98.4                       | 62.17       |
| Robetta (3-R2_07) | 0.5               | 0             | 100                 | 0                         | 0 | 74      | 100 | 74      | 100 | 0 / 606   | 0 | 7 / 819    | 0.85 | 100         | 98.4                       | 60.20       |
| Robetta (3-R2_09) | 0.5               | 0             | 100                 | 0                         | 0 | 74      | 100 | 74      | 100 | 0 / 606   | 0 | 6 / 819    | 0.73 | 100         | 100                        | 62.89       |
| Robetta (3-R2_10) | 0.5               | 0             | 100                 | 0                         | 0 | 74      | 100 | 74      | 100 | 0 / 606   | 0 | 5 / 819    | 0.61 | 100         | 100                        | 60.43       |
| Robetta (4-R2_10) | 0.5               | 0             | 100                 | 0                         | 0 | 74      | 100 | 74      | 100 | 0 / 606   | 0 | 7 / 819    | 0.85 | 92.6471     | 98.4                       | 65.95       |
| Robetta (5-R2_01) | 0.5               | 0             | 100                 | 0                         | 0 | 74      | 100 | 74      | 100 | 0 / 606   | 0 | 7 / 819    | 0.85 | 100         | 100                        | 61.58       |
| Robetta (5-R2_02) | 0.5               | 0             | 100                 | 0                         | 0 | 74      | 100 | 74      | 100 | 0 / 606   | 0 | 8 / 819    | 0.98 | 100         | 98.4                       | 64.99       |
| Robetta (5-R2_04) | 0.5               | 0             | 100                 | 0                         | 0 | 74      | 100 | 74      | 100 | 0 / 606   | 0 | 4 / 819    | 0.49 | 100         | 98.4                       | 57.48       |
| Robetta (5-R2_06) | 0.5               | 0             | 100                 | 0                         | 0 | 74      | 100 | 74      | 100 | 0 / 606   | 0 | 7 / 819    | 0.85 | 100         | 100                        | 58.73       |
| Robetta (5-R2_08) | 0.5               | 0             | 100                 | 0                         | 0 | 74      | 100 | 74      | 100 | 0 / 606   | 0 | 7 / 819    | 0.85 | 100         | 98.4                       | 59.33       |
| Robetta (5-R2_09) | 0.5               | 0             | 100                 | 0                         | 0 | 74      | 100 | 74      | 100 | 0 / 606   | 0 | 7 / 819    | 0.85 | 100         | 98.4                       | 60.03       |

| Code Name            | Galaxy Web Server |               |                     | MolProbity Server         |   |         |     |         |     |           |   |            |      | SAVESv6.0   | Deep UMQA                  |             |
|----------------------|-------------------|---------------|---------------------|---------------------------|---|---------|-----|---------|-----|-----------|---|------------|------|-------------|----------------------------|-------------|
|                      | MolProbity Score  | Poor Rotamers | Rama Favored Region | Ramachandran plot regions |   |         |     |         |     | Bad bonds |   | Bad angles |      | ERRAT Score | Rama Most Favoured Regions | Global IDDT |
|                      |                   |               |                     | Outliers                  |   | Allowed |     | Favored |     | N         | % | N          | %    |             |                            |             |
|                      |                   |               |                     | N                         | % | N       | %   | N       | %   |           |   |            |      |             |                            |             |
| D-I-TASSER (4-R2_10) | 0.5               | 0             | 100                 | 0                         | 0 | 74      | 100 | 74      | 100 | 0 / 606   | 0 | 6 / 819    | 0.73 | 100         | 98.4                       | 60.98       |
| QUARK (1-R2_04)      | 0.5               | 0             | 100                 | 0                         | 0 | 74      | 100 | 74      | 100 | 0 / 606   | 0 | 5 / 819    | 0.61 | 100         | 98.4                       | 63.23       |
| QUARK (1-R2_07)      | 0.5               | 0             | 100                 | 0                         | 0 | 74      | 100 | 74      | 100 | 0 / 606   | 0 | 6 / 819    | 0.73 | 91.1765     | 96.7                       | 62.60       |
| QUARK (2-R2_01)      | 0.5               | 0             | 100                 | 0                         | 0 | 74      | 100 | 74      | 100 | 0 / 606   | 0 | 6 / 819    | 0.73 | 100         | 98.4                       | 57.69       |
| QUARK (2-R2_05)      | 0.5               | 0             | 100                 | 0                         | 0 | 74      | 100 | 74      | 100 | 0 / 606   | 0 | 6 / 819    | 0.73 | 100         | 96.7                       | 57.52       |
| QUARK (2-R2_06)      | 0.5               | 0             | 100                 | 0                         | 0 | 74      | 100 | 74      | 100 | 0 / 606   | 0 | 7 / 819    | 0.85 | 91.1765     | 100                        | 58.17       |
| QUARK (2-R2_10)      | 0.5               | 0             | 100                 | 0                         | 0 | 74      | 100 | 74      | 100 | 0 / 606   | 0 | 6 / 819    | 0.73 | 98.5294     | 100                        | 57.63       |

**Table S2.** Single-stranded DNA structure modeling method validation results.

| PDB ID | Secondary Structure Software                                                                                                                                                                                                           | Secondary Structure (dot-bracket notation) | MolProbity Validation |           | RMSD to Template |
|--------|----------------------------------------------------------------------------------------------------------------------------------------------------------------------------------------------------------------------------------------|--------------------------------------------|-----------------------|-----------|------------------|
|        |                                                                                                                                                                                                                                        |                                            | Bad Bond              | Bad Angle |                  |
| 7YF7   | mFold (DNA)                                                                                                                                                                                                                            | (.....)...                                 | 0.00%                 | 0.74%     | 9.865            |
| 7YF7   | RNAstructure (DNA), RNAprobing (DNA), RNAfold (DNA), RNAfold in 3dDNA, MC-Fold, RNAstructure (RNA), RNAprobing (RNA), RNAfold (RNA), CentroidFold, EternaFold, CONTRAfold, IPknot, LinearFold-V, RNAProbe's Consensus                  | .....                                      | 0.00%                 | 0.74%     | 9.865            |
| 7YF7   | mFold (RNA)                                                                                                                                                                                                                            | ((...))...                                 | 0.00%                 | 1.48%     | 3.352            |
| 8FIL   | mFold (DNA), RNAstructure (DNA), RNAprobing (DNA), RNAfold (DNA), RNAfold in 3dDNA, mFold (RNA), RNAstructure (RNA), RNAprobing (RNA), RNAfold (RNA), CentroidFold, EternaFold, CONTRAfold, IPknot, LinearFold-V, RNAProbe's Consensus | .((((.....)))                              | 0.80%                 | 0.26%     | 3.375            |
| 8FIL   | MC-Fold                                                                                                                                                                                                                                | (((((.....))))                             | 0.80%                 | 1.05%     | 3.347            |
| 8X4F   | mFold (DNA), RNAstructure (DNA), RNAprobing (DNA), RNAfold (DNA), RNAfold in 3dDNA, mFold (RNA), RNAstructure (RNA), RNAprobing (RNA), RNAfold (RNA), CentroidFold, EternaFold, CONTRAfold, IPknot, LinearFold-V, RNAProbe's Consensus | ((.(.....).))                              | 0.00%                 | 0.24%     | 6.111            |
| 8X4F   | MC-Fold                                                                                                                                                                                                                                | (((((.....))))                             | 0.00%                 | 1.20%     | 3.835            |
| 8GZK   | mFold (DNA), RNAstructure (DNA), RNAfold (DNA)                                                                                                                                                                                         | ((((((((((.....))))))))                    | 0.00%                 | 0.49%     | 8.346            |
| 8GZK   | RNAprobing (DNA), RNAfold in 3dDNA, mFold (RNA), RNAstructure (RNA), RNAprobing (RNA), RNAfold (RNA), CentroidFold, EternaFold, CONTRAfold, IPknot, LinearFold-V, RNAProbe's Consensus                                                 | ((((((((((((((.....))))))))                | 0.00%                 | 0.86%     | 7.580            |
| 8GZK   | MC-Fold                                                                                                                                                                                                                                | ((((((((((((((.....))))))))                | 0.00%                 | 0.86%     | 7.580            |
| 8GZL   | mFold (DNA), RNAstructure (DNA), RNAfold (DNA)                                                                                                                                                                                         | ((((((((((((((.....))))))))                | 0.00%                 | 0.62%     | 8.177            |
| 8GZL   | RNAprobing (DNA), MC-Fold, mFold (RNA), RNAprobing (RNA), RNAfold (RNA), CentroidFold, EternaFold, CONTRAfold, IPknot, 2Lfc, RNAProbe's Consensus                                                                                      | ((((((((((((((((((.....))))))))            | 0.00%                 | 0.98%     | 6.139            |
| 8GZL   | RNAfold in 3dDNA, LinearFold-V                                                                                                                                                                                                         | ((((((((((((((((((.....))))))))            | 0.00%                 | 1.85%     | 7.214            |
| 8GZL   | RNAstructure (RNA)                                                                                                                                                                                                                     | ((((((((((((((((((.....))))))))            | 0.19%                 | 1.85%     | 6.889            |
| 8GZM   | mFold (DNA), RNAstructure (DNA), RNAfold (DNA)                                                                                                                                                                                         | ((((((((((((((((((.....))))))))            | 0.00%                 | 0.49%     | 6.183            |

| PDB ID | Secondary Structure Software                                                                                                                                 | Secondary Structure (dot-bracket notation) | MolProbity Validation |           | RMSD to Template |
|--------|--------------------------------------------------------------------------------------------------------------------------------------------------------------|--------------------------------------------|-----------------------|-----------|------------------|
|        |                                                                                                                                                              |                                            | Bad Bond              | Bad Angle |                  |
| 8GZM   | RNAprobing (DNA), RNAfold in 3dDNA, mFold (RNA), RNAstructure (RNA), RNAprobing (RNA), RNAfold (RNA), LinearFold-V                                           | ((((((((((.....))))))))))                  | 0.00%                 | 0.86%     | 6.777            |
| 8GZM   | MC-Fold                                                                                                                                                      | (((((((((((((...))))))))))))               | 0.00%                 | 0.49%     | 6.903            |
| 8GZM   | CentroidFold, EternaFold, CONTRAfold, IPknot, RNAProbe's Consensus                                                                                           | ((((((((((((((.....))))))))))))            | 0.00%                 | 1.23%     | 5.218            |
| 8IF5   | mFold (DNA), RNAstructure (DNA), RNAfold (DNA), RNAstructure (RNA), RNAfold (RNA), IPknot, RNAProbe's Consensus                                              | (((((.....))))                             | 0.18%                 | 1.04%     | 12.791           |
| 8IF5   | RNAprobing (DNA), RNAfold in 3dDNA, RNAprobing (RNA), EternaFold, CONTRAfold, LinearFold-V                                                                   | (((((.....(.....)....)))))                 | 0.18%                 | 1.74%     | 12.654           |
| 8IF5   | MC-Fold                                                                                                                                                      | ((((((((((((((.....))))))))))))            | 0.18%                 | 0.23%     | 7.917            |
| 8IF5   | mFold (RNA)                                                                                                                                                  | (((((.....(.....)....)))))                 | 0.18%                 | 1.62%     | 12.737           |
| 8IF5   | CentroidFold                                                                                                                                                 | (((((.....)....)))))                       | 0.18%                 | 0.70%     | 12.750           |
| 8TQS   | mFold (DNA)                                                                                                                                                  | ..((((.....))).....(.....).                | 0.00%                 | 2.35%     | 16.579           |
| 8TQS   | RNAstructure (DNA), RNAfold (DNA)                                                                                                                            | ..((((.....)))..(((.....))).               | 0.60%                 | 2.35%     | 20.813           |
| 8TQS   | RNAprobing (DNA), mFold (RNA), RNAstructure (RNA), RNAprobing (RNA), RNAfold (RNA)                                                                           | ..((((.....))).(((.....)))                 | 0.00%                 | 1.57%     | 16.833           |
| 8TQS   | RNAfold in 3dDNA, EternaFold, LinearFold-V, RNAProbe's Consensus                                                                                             | ..((((.....))).....                        | 0.00%                 | 2.05%     | 16.277           |
| 8TQS   | MC-Fold                                                                                                                                                      | ..((((.....)))(((((.....))))))             | 0.00%                 | 1.17%     | 22.230           |
| 8TQS   | CentroidFold, IPknot                                                                                                                                         | ..((((.....))).....((.....))               | 0.00%                 | 1.37%     | 17.530           |
| 8TQS   | CONTRAfold                                                                                                                                                   | ..((((.....))).(((.....)))                 | 0.00%                 | 2.45%     | 15.621           |
| 8BM4   | mFold (DNA)                                                                                                                                                  | ....((..((.....))..)).....                 | 0.00%                 | 1.84%     | 13.066           |
| 8BM4   | RNAstructure (DNA), RNAfold (DNA)                                                                                                                            | ((((((.....((.....))..))..)))              | 0.00%                 | 0.55%     | 6.833            |
| 8BM4   | RNAprobing (DNA), RNAfold in 3dDNA, mFold (RNA), RNAstructure (RNA), RNAprobing (RNA), RNAfold (RNA), EternaFold, IPknot, LinearFold-V, RNAProbe's Consensus | (((((.....((.....))..)).....)))            | 0.00%                 | 1.57%     | 10.384           |
| 8BM4   | MC-Fold                                                                                                                                                      | (((((((((((((((((...))))))))))))))         | 0.00%                 | 2.58%     | 6.509            |

| PDB ID | Secondary Structure Software                                                                           | Secondary Structure (dot-bracket notation) | MolProbity Validation |           | RMSD to Template |
|--------|--------------------------------------------------------------------------------------------------------|--------------------------------------------|-----------------------|-----------|------------------|
|        |                                                                                                        |                                            | Bad Bond              | Bad Angle |                  |
| 8BM4   | CentroidFold, CONTRAfold                                                                               | (((((...(((.(.....)).))..)))))             | 0.00%                 | 0.83%     | 7.661            |
| 8OR8   | mFold (DNA)                                                                                            | (((((...(((.....)).((.....))....))))))     | 0.13%                 | 1.49%     | 7.309            |
| 8OR8   | RNAstructure (DNA), RNAfold (DNA)                                                                      | (((((...(((.....((.....))))))))))          | 0.13%                 | 2.31%     | 14.848           |
| 8OR8   | RNAprobing (DNA), RNAfold in 3dDNA, RNAprobing (RNA), CONTRAfold, LinearFold-V                         | ((((((((((((.(.....).)))))..))))))         | 0.89%                 | 1.90%     | 17.912           |
| 8OR8   | MC-Fold                                                                                                | (((((...(((.(.....))))))))))               | 0.13%                 | 2.23%     | 20.369           |
| 8OR8   | mFold (RNA), RNAstructure (RNA), RNAfold (RNA), CentroidFold, EternaFold, IPknot, RNAProbe's Consensus | ((((((((((.....))))))..))))                | 0.89%                 | 1.90%     | 17.912           |
| 8OR8   | RfCR                                                                                                   | (((((.(.....))))..))))                     | 0.13%                 | 1.24%     | 16.833           |
| 8BM6   | mFold (DNA), RNAstructure (DNA), RNAfold (DNA)                                                         | ((..((..((.....)).))..)).....              | 0.24%                 | 0.63%     | 14.938           |
| 8BM6   | RNAprobing (DNA), RNAfold in 3dDNA, RNAstructure (RNA), RNAprobing (RNA), RNAfold (RNA), LinearFold-V  | ((..((..((.....)).))..))..                 | 0.12%                 | 1.65%     | 9.018            |
| 8BM6   | MC-Fold                                                                                                | ((((((((((((.....))((.....))))))))))       | 0.12%                 | 1.18%     | 11.983           |
| 8BM6   | mFold (RNA)                                                                                            | ((..((.....((.....)).)).....))..           | 0.24%                 | 1.26%     | 14.477           |
| 8BM6   | CentroidFold                                                                                           | ...((.....((.....)).)).....))..            | 0.36%                 | 2.28%     | 15.817           |
| 8BM6   | EternaFold, RNAProbe's Consensus                                                                       | .....                                      | 0.12%                 | 1.49%     | 21.964           |
| 8BM6   | CONTRAfold                                                                                             | ((..((.....((.....)).)).....))..           | 0.36%                 | 2.20%     | 15.817           |
| 8BM6   | IPknot                                                                                                 | .....((.....)).....                        | 0.24%                 | 0.47%     | 18.308           |
| 8BM7   | mFold (DNA), RNAstructure (DNA), RNAfold (DNA)                                                         | ((..((.....((.....)).))..)).....           | 0.46%                 | 0.89%     | 19.864           |
| 8BM7   | RNAprobing (DNA), RNAfold in 3dDNA, RNAprobing (RNA), RNAfold (RNA), LinearFold-V                      | ((..((.....((.....)).))..))....            | 0.46%                 | 0.97%     | 15.403           |
| 8BM7   | MC-Fold                                                                                                | ((((((((((((((.....))((.....))))))))))))   | 0.46%                 | 1.12%     | 13.620           |
| 8BM7   | mFold (RNA), CentroidFold, IPknot                                                                      | ...((.....((.....)).((.....)).))..         | 10.45%                | 13.93%    |                  |
| 8BM7   | RNAstructure (RNA)                                                                                     | ((..((.....((.....)).))..)((.....)).       | 0.46%                 | 1.64%     | 25.718           |

| PDB ID | Secondary Structure Software | Secondary Structure (dot-bracket notation) | MolProbity Validation |           | RMSD to Template |
|--------|------------------------------|--------------------------------------------|-----------------------|-----------|------------------|
|        |                              |                                            | Bad Bond              | Bad Angle |                  |
| 8BM7   | EternaFold                   | ...((...((...((.....))..))..)).            | 0.46%                 | 0.97%     | 10.579           |
| 8BM7   | CONTRAFold                   | ...((...(((.(.....)).....))..)).           | 2.30%                 | 4.55%     | 15.212           |
| 8BM7   | RNAProbe's Consensus         | ...((...((.....))..)).                     | 0.46%                 | 0.60%     | 6.906            |

**Table S3.** Aptamer truncation docking results.

| No | Deleted Bases | Sequence                               | Secondary Structure                            | Length | HADDOCK Score |
|----|---------------|----------------------------------------|------------------------------------------------|--------|---------------|
| 1  | 41-72         | GGCAGGAAGACAAACAGGTCGTAGTGGAACGTCCACCG | ((((((((((((...))))))(((((...))))))))))        | 40     | -47.3 ± 10.2  |
| 2  | 1, 42-72      | GCAGGAAGACAAACAGGTCGTAGTGGAACGTCCACCGT | ((.(((((((((((...))))))(((((...))))))))))      | 40     | -51.9 ± 9.1   |
| 3  | 1-2, 43-72    | CAGGAAGACAAACAGGTCGTAGTGGAACGTCCACCGTA | .((((((((((((...))))))(((((...))))))))).       | 40     | -72.8 ± 20.6  |
| 4  | 1-3, 44-72    | AGGAAGACAAACAGGTCGTAGTGGAACGTCCACCGTAG | ((((((((((((...))))))(((((...))))))))..        | 40     | -54.4 ± 6.9   |
| 5  | 1-4, 45-72    | GGAAGACAAACAGGTCGTAGTGGAACGTCCACCGTAGA | ((((...))(((.(((((((((((...))))))..))))))..    | 40     | -45.7 ± 16    |
| 6  | 1-5, 46-72    | GAAGACAAACAGGTCGTAGTGGAACGTCCACCGTAGAC | ((((((((...(((((((((((((((...))))))..))))))))) | 40     | -47.8 ± 16.3  |
| 7  | 1-6, 47-72    | AAGACAAACAGGTCGTAGTGGAACGTCCACCGTAGACC | .(((((((.(((((((((((((...))))))..)))))))))     | 40     | -50.8 ± 4.8   |
| 8  | 1-7, 48-72    | AGACAAACAGGTCGTAGTGGAACGTCCACCGTAGACCG | ((((((((.(((((((((((((...))))))..)))))))))     | 40     | -80.8 ± 24.1  |
| 9  | 1-8, 49-72    | GACAAACAGGTCGTAGTGGAACGTCCACCGTAGACCGG | .....((((((((((((((((...))))))..))))))         | 40     | -60.6 ± 4.8   |
| 10 | 1-9, 50-72    | ACAAACAGGTCGTAGTGGAACGTCCACCGTAGACCGGT | ....((((((((((((((((((((...))))))..))))))      | 40     | -39.4 ± 8.9   |
| 11 | 1-10, 51-72   | CAAACAGGTCGTAGTGGAACGTCCACCGTAGACCGGTT | ..((((((((((((((((((((((((...))))))..))))))    | 40     | -53.8 ± 14    |



**Table S4.** Secondary structure in dot-bracket notation similarity.

| Apt. Name | Secondary Structure (in dot-bracket notation)             | Secondary Structure Differences | Similar? | Branch Number |
|-----------|-----------------------------------------------------------|---------------------------------|----------|---------------|
| md3       | ((((((((.((((((((((.(.)))))))).)))))))))))))              | 2                               | TRUE     | 1             |
| md11      | ((((((((.((((((((((.(.)))))))).)))))))))))).              | 2                               | TRUE     | 1             |
| md32      | ((((((((.((((((((((.(.)))))))).)))))))))))))              | 2                               | TRUE     | 1             |
| md43      | ((((((((.((((((((((.(.)))))))).)))))))))))))              | 2                               | TRUE     | 1             |
| md45      | ((((((((.((((((((((.(.)))))))).)))))))))))))              | 2                               | TRUE     | 1             |
| md47      | ((.(((((((.((((((((((.(.)))))))).)))))))))))).            | 2                               | TRUE     | 1             |
| md6       | ((((.((((((((((((((((.(.)))))))))..)))))))).              | 4                               | TRUE     | 1             |
| md22      | ((((((((.((((((((((.(.)))))))).)))))))))))))              | 4                               | TRUE     | 1             |
| md24      | ((((((((.((((((((((.(.)))))))).)))))))))))))              | 4                               | TRUE     | 1             |
| md37      | ((((((((.((((((((((.(.)))))))).)))))))))))).              | 4                               | TRUE     | 1             |
| md41      | ((((((((.((((((((((.(.)))))))).)))))))))))).              | 4                               | TRUE     | 1             |
| md46      | ((((((((.((((((((((.(.)))))))).)))))))))))).              | 4                               | TRUE     | 1             |
| md49      | ((((((((.((((((((((.(.)))))))).)))))))))))).              | 4                               | TRUE     | 1             |
| md10      | ((((((((.((((((((((.(.)))))))).)))))))))))).              | 6                               | TRUE     | 1             |
| md27      | ((((((((.((((((((((.(.)))))))).)))))))))))).              | 6                               | TRUE     | 1             |
| md20      | ((((((((.((((((((((.(. ....)))))))).)))))))).             | 8                               | TRUE     | 1             |
| md25      | ((((((((.((((((((((.(. ....)))))))).)))))))).             | 8                               | TRUE     | 1             |
| md34      | ((((((((.((((((((((.(. ....)))))))).)))))))).             | 8                               | TRUE     | 1             |
| md50      | ((((((((.((((((((((.(. ....)))))))).)))))))).             | 8                               | TRUE     | 1             |
| md1       | ...(((((((((.((((((((((.(. ....)))))))).)))))))))))))     | 10                              |          | 1             |
| md2       | .....(.((((((((((((((((((.(. ....)))))))))..)))))))).     | 15                              |          | 1             |
| md12      | .....(.((((((((((((((((((.(. ....)))))))))..)))))))).     | 15                              |          | 1             |
| md16      | .....(.((((((((((((((((((.(. ....)))))))))..)))))))).     | 15                              |          | 1             |
| md29      | .....(.((((((((((((((((((.(. ....)))))))))..)))))))).     | 15                              |          | 1             |
| md39      | .....(((((((((((((((((((((.(. ....)))))))))..)))))))).    | 15                              |          | 1             |
| md40      | .....(((((((((((((((((((((.(. ....)))))))))..)))))))).    | 15                              |          | 1             |
| md26      | .....(.((((((((((((((((((.(. ....)))))))))..)))))))).     | 16                              |          | 1             |
| md28      | .....(.(((.(.(((((((((((((((.(. ....)))))))))..)))))))).  | 16                              |          | 1             |
| md14      | .....(.(((((((((.(. ....)))))))).))..)))))                | 17                              |          | 1             |
| md15      | .....(.(((.(. ....))))..)))))                             | 17                              |          | 1             |
| md13      | ((((((((...(((((((((.(. ....)))))))))..)))))))).          | 13                              |          | 2             |
| md17      | (((((...)))((((((((((((((((((.(. ....)))))))))..)))))))). | 13                              |          | 2             |
| md18      | (((((...)))((((((((((((((((((.(. ....)))))))))..)))))))). | 14                              |          | 2             |
| md31      | ..(((...)))((((((((((((((((((.(. ....)))))))))..)))))))). | 14                              |          | 2             |
| md33      | (((((...)))((((((((((((((((((.(. ....)))))))))..)))))))). | 14                              |          | 2             |
| md36      | (((((...)))((((((((((((((((((.(. ....)))))))))..)))))))). | 14                              |          | 2             |
| md44      | .....(((((((((((((((((((((.(. ....)))))))))..)))))))).    | 14                              |          | 2             |
| md4       | (((((...)))((((((((((((((((((.(. ....)))))))))..)))))))). | 15                              |          | 2             |
| md30      | .....(((((((((.(. ....)))))))))..)))))                    | 16                              |          | 2             |
| md35      | (((((...)))((((((((((((((((((.(. ....)))))))))..)))))))). | 16                              |          | 2             |
| md7       | ((((((((((((((((((((.(. ....)))))))))..)))))))).(((...))) | 19                              |          | 2             |

| Apt. Name | Secondary Structure (in dot-bracket notation) | Secondary Structure Differences | Similar? | Branch Number |
|-----------|-----------------------------------------------|---------------------------------|----------|---------------|
| md23      | (((((.(.)))))(((((.)))))                      | 22                              |          | 2             |
| md19      | ...(((.)))))(((((.)))))                       | 25                              |          | 2             |
| md21      | (((((.)))))(((((.)))))                        | 25                              |          | 2             |
| md5       | .(((.)))))(((((.)))))                         | 18                              |          | 3             |
| md8       | (((((.)))))(((((.)))))                        | 18                              |          | 3             |
| md38      | (((((.)))))(((((.)))))                        | 18                              |          | 3             |
| md48      | .(((.)))))(((((.)))))                         | 19                              |          | 3             |
| md42      | (((((.)))))(((((.)))))                        | 21                              |          | 3             |
| md9       | .(((.)))))(((((.)))))                         | 24                              |          | 3             |
| m2d10     | (((((.)))))                                   | 0                               | TRUE     | 1             |
| m2d1      | (((((.)))))                                   | 2                               | TRUE     | 1             |
| m2d2      | (((((.)))))                                   | 2                               | TRUE     | 1             |
| m2d3      | (((((.)))))                                   | 2                               | TRUE     | 1             |
| m2d5      | (((((.)))))                                   | 2                               | TRUE     | 1             |
| m2d8      | (((((.)))))                                   | 2                               | TRUE     | 1             |
| m2d11     | (((((.)))))                                   | 2                               | TRUE     | 1             |
| m2d12     | (((((.)))))                                   | 2                               | TRUE     | 1             |
| m2d13     | (((((.)))))                                   | 2                               | TRUE     | 1             |
| m2d16     | (((((.)))))                                   | 2                               | TRUE     | 1             |
| m2d17     | (((((.)))))                                   | 2                               | TRUE     | 1             |
| m2d18     | (((((.)))))                                   | 2                               | TRUE     | 1             |
| m2d19     | (((((.)))))                                   | 2                               | TRUE     | 1             |
| m2d21     | (((((.)))))                                   | 2                               | TRUE     | 1             |
| m2d23     | (((((.)))))                                   | 2                               | TRUE     | 1             |
| m2d24     | (((((.)))))                                   | 2                               | TRUE     | 1             |
| m2d28     | (((((.)))))                                   | 2                               | TRUE     | 1             |
| m2d32     | (((((.)))))                                   | 2                               | TRUE     | 1             |
| m2d33     | (((((.)))))                                   | 2                               | TRUE     | 1             |
| m2d36     | (((((.)))))                                   | 2                               | TRUE     | 1             |
| m2d37     | (((((.)))))                                   | 2                               | TRUE     | 1             |
| m2d39     | (((((.)))))                                   | 2                               | TRUE     | 1             |
| m2d40     | (((((.)))))                                   | 2                               | TRUE     | 1             |
| m2d44     | (((((.)))))                                   | 2                               | TRUE     | 1             |
| m2d46     | (((((.)))))                                   | 2                               | TRUE     | 1             |
| m2d48     | (((((.)))))                                   | 2                               | TRUE     | 1             |
| m2d49     | (((((.)))))                                   | 2                               | TRUE     | 1             |
| m2d50     | (((((.)))))                                   | 2                               | TRUE     | 1             |
| m2d4      | (((((.)))))                                   | 4                               | TRUE     | 1             |
| m2d6      | .(((.)))))                                    | 4                               | TRUE     | 1             |
| m2d7      | (((((.)))))                                   | 4                               | TRUE     | 1             |
| m2d9      | (((((.)))))                                   | 4                               | TRUE     | 1             |
| m2d20     | (((((.)))))                                   | 4                               | TRUE     | 1             |

| Apt. Name | Secondary Structure (in dot-bracket notation) | Secondary Structure Differences | Similar? | Branch Number |
|-----------|-----------------------------------------------|---------------------------------|----------|---------------|
| m2d22     | ((((((((.(.)))))))))                          | 4                               | TRUE     | 1             |
| m2d25     | ((((((((.(.)))))))))                          | 4                               | TRUE     | 1             |
| m2d30     | ((((((((.(.)))))))))                          | 4                               | TRUE     | 1             |
| m2d31     | ((((((((.(.)))))))))                          | 4                               | TRUE     | 1             |
| m2d34     | ((((((((.(.)))))))))                          | 4                               | TRUE     | 1             |
| m2d43     | ((((((((.(.)))))))))                          | 4                               | TRUE     | 1             |
| m2d45     | ((((((((.(.)))))))))                          | 4                               | TRUE     | 1             |
| m2d14     | (((.(((.(.))))))                              | 6                               | TRUE     | 1             |
| m2d15     | (((.(((.(.))))))                              | 6                               | TRUE     | 1             |
| m2d27     | ((((((((.(.))))))                             | 6                               | TRUE     | 1             |
| m2d29     | ((((((((.(.))))))                             | 6                               | TRUE     | 1             |
| m2d38     | ((((((((.(.))))))                             | 6                               | TRUE     | 1             |
| m2d47     | ((((((((.(.))))))                             | 6                               | TRUE     | 1             |
| m2d42     | ((((((((.(.))))))                             | 8                               | TRUE     | 1             |
| m2d26     | (((.(((.(.)))                                 | 16                              |          | 3             |
| m2d35     | (((.(((.(.)))                                 | 16                              |          | 3             |
| m2d41     | ((((((((.(.)))                                | 22                              |          | 3             |

**Table S5.** Aptamer random mutations docking results.

| Mutated Aptamer | Sequence                                  | Seq. Differences to Parent Aptamer | Secondary Structure                          | SS Differences to Parent Aptamer | HADDOCK Score |
|-----------------|-------------------------------------------|------------------------------------|----------------------------------------------|----------------------------------|---------------|
| tN20a-fm1       | AGACAAACAGTTCCTTAGTGGAAGTTCAGCGTAGATAG    | 6                                  | ...((((((((((((((((((...))))))))))))))       | 10                               | -             |
| tN20a-fm2       | AGACAAACAGGTCGTAGTGTAGTACCACAAAAGACCG     | 7                                  | .....(.((((((((((((((((((...))))))))))))))   | 15                               | -             |
| tN20a-fm3       | CGGCATGCAGGTCGTAGTGGAAACTGTCCACCGTAGACTG  | 5                                  | (((((((((.((((((((((((.(...))))))))))))))    | 2                                | -44.5 ± 9.5   |
| tN20a-fm4       | AGTCAACCCGGTCGTAGGGGAAACTGTCCATCGTAGACCG  | 5                                  | (((.)))(((((((((((((((((((...))))))))))))    | 15                               | -             |
| tN20a-fm5       | AGACAAACAGGTCGTACTGGAAGTCAACACCGTACACAG   | 6                                  | .((((...)))((((((((((((((((((...))))))))))   | 18                               | -             |
| tN20a-fm6       | TGACAAACGGGTCGCAGTGGAACTGTCCACCGTAGACCG   | 4                                  | (((((.(((((((((((((((((((...))))))))))))))   | 4                                | -21 ± 14.1    |
| tN20a-fm7       | AGACAATTAGGTCGTAGGGCAAAGTGTCCACCGTAGACCG  | 4                                  | ((((((((((((((((((((((...))))))))))))))      | 19                               | -             |
| tN20a-fm8       | AGACAAACAGGTCGTGGCGAAACTCTCCAACGTAGACGG   | 6                                  | (((((...)))((((((((((((((((((...))))))))))   | 18                               | -             |
| tN20a-fm9       | ATACAGACAGGTCGTAGTGGAAACTGTCCACCGTAGACCG  | 2                                  | .(((.((((...))))))((((((((((((((((((...))))  | 24                               | -             |
| tN20a-fm10      | AGACTAACAGGTCGAGTGGATGCTGTCTACGTAGACCG    | 7                                  | ((((((((((((((((((((((((...))))))))))))))    | 6                                | -35.6 ± 16.3  |
| tN20a-fm11      | AGACAAACAGGTCGAAGTGGAAACTGTCCACCGTAGACCG  | 1                                  | (((((.(.((((((((((((((((((...))))))))))))))  | 2                                | -34.7 ± 11.7  |
| tN20a-fm12      | ATACAAACAGGTCCTTAGTGGAAGTGTCTACCGAAGACCG  | 4                                  | .....(.((((((((((((((((((...))))))))))))     | 15                               | -             |
| tN20a-fm13      | AGACAAACAATTCGTAGAGGAAACGGTTCACCGCAGACAG  | 7                                  | (((((...((((((((((((((((((...))))))))))))))  | 13                               | -             |
| tN20a-fm14      | AAACAAACAGGTCGGAGTGGAAACTGTCTCCGTAGACCG   | 3                                  | .....(.((((((((((((((((((...))))))))))))     | 17                               | -             |
| tN20a-fm15      | ATACAAACAGGTCGTACTGGAAGTGTCCACCGTAGACCG   | 3                                  | .....(.(((.((((...))))))(.)))))              | 17                               | -             |
| tN20a-fm16      | AAACACGCAGGTCGTAGTGGAAAGTGTCCACCGTAGACCG  | 4                                  | .....(.((((((((((((((((((...))))))))))))     | 15                               | -             |
| tN20a-fm17      | AGGCAAACAAGTCGTAGTGGAAAGTTACACCGTAGACCG   | 5                                  | (((.)))(((((((((((((((((((...))))))))))))))  | 13                               | -             |
| tN20a-fm18      | AGGCAAACAGGTAGGTGTGGAAAGTGTCCACCGTAGACCG  | 7                                  | (((.)))(((((((((((((((((((...))))))))))))))  | 14                               | -             |
| tN20a-fm19      | AGACAAACAGCTGGTAGAGGACACTGTCCACCGTAGACCT  | 5                                  | ...((((((((((((((((((((...))))))))))))))     | 25                               | -             |
| tN20a-fm20      | AGACAATGAGGTCGTAGTGGTAAATGTCCACCGTGTAGCG  | 6                                  | ((((((((((((((((((((((((...))))))))))))))    | 8                                | -61.2 ± 12.6  |
| tN20a-fm21      | AGACAAACAAGTCGTTGTGGAAAGGTATGCACCGTAGACCG | 6                                  | ((((((((((((((((((((((((...))))))))))))))    | 25                               | -             |
| tN20a-fm22      | AGGCCGACAGTTCATAGTGGAAACTGGCCACCGTAGGCCG  | 7                                  | ((((((((((((((((((((((((...))))))))))))))    | 4                                | -50.1 ± 11.7  |
| tN20a-fm23      | AGACAGACAGGTCGTAGTGGTATCTGTCCACCGTAGACCG  | 3                                  | (((((.((((...))))))((((((((((((((((((...)))) | 22                               | -             |
| tN20a-fm24      | AGACAAACAGGGCGTAGTGGAAACTGTCCACCGTGTAGCG  | 2                                  | ((((((((((((((((((((((((...))))))))))))))    | 4                                | -47.1 ± 15    |
| tN20a-fm25      | AGACACACAGGCCTTAGTGGAACTGTGGCCACCGTAGGCCG | 6                                  | ((((((((((((((((((((((((...))))))))))))))    | 8                                | -55.8 ± 9.5   |

| Mutated Aptamer | Sequence                                   | Seq. Differences to Parent Aptamer | Secondary Structure                             | SS Differences to Parent Aptamer | HADDOCK Score |
|-----------------|--------------------------------------------|------------------------------------|-------------------------------------------------|----------------------------------|---------------|
| tN20a-fm26      | GCACACACAGGTCGTAGTGGAGACTGTCCACCGTAGACCG   | 4                                  | .....(.((((((((((((.....)))))))).))))))         | 16                               | -             |
| tN20a-fm27      | TGACACAGAGGTAAGTGGAAACAGTCCACCGTAGACCG     | 6                                  | ((((((((((((.(.(((.(.)))))))))))..)))).         | 6                                | -43.3 ± 14.5  |
| tN20a-fm28      | AGCCAAACAGGTCGTAGAGAAAAGTCCACGCTACACCG     | 6                                  | .....(.(((.(((((((((.....)))))))))..)))))       | 16                               | -             |
| tN20a-fm29      | AGACAAACAGGTCGATGTGGAAAGTGTCCACCGTCGACCG   | 4                                  | .....(.((((((((((((.....)))))))).))))))         | 15                               | -             |
| tN20a-fm30      | AGAAAAATAGGTCATAGTGGAAACGGGCCACCCATAACCG   | 7                                  | .....((((((.((((.(.)))))..)))))                 | 16                               | -             |
| tN20a-fm31      | AGACAATTCGGTCGGAGTGGAAAGTGTCCACCGTACACCG   | 6                                  | .(((.(.)))(((((((((((((.....)))))))).))))))     | 14                               | -             |
| tN20a-fm32      | AGACATACAGGTGGTAGTGGAAAGTGTCCACCGTAGACCG   | 3                                  | ((((((((((((.(.(((.(.))))))))..)))))            | 2                                | -86.4 ± 15.2  |
| tN20a-fm33      | AGCAAGGCAGGTCGTAGTGGAAATGTCCACCGTAGACCA    | 6                                  | ((((.(.)))(((((((((((((.....)))))))).))))))     | 14                               | -             |
| tN20a-fm34      | AGACAAACAGTTCGTAGTGGAGACTGTCCACCGTAGACCG   | 4                                  | (((((.(((((((((.....)))))))))..)))))            | 8                                | -41 ± 15.2    |
| tN20a-fm35      | AGAAAAATCAGGTCGTAAGTGGAAAGTGTCCACCGAAGACCC | 5                                  | ((((.(.)))(((((((((((((.....)))))))).))))))     | 16                               | -             |
| tN20a-fm36      | TGACAAACAGGTCGTAGGTGGAAAGTGTCCACTGTAGACCC  | 5                                  | ((((.(.)))(((((((((((((.....)))))))).))))))     | 14                               | -             |
| tN20a-fm37      | AGACAAACAGGTCGGAGTTGAAAGTATCCACCGCAGACAG   | 5                                  | ((((((((.(.(((.(.)))))..)))))..)))))            | 4                                | -41.9 ± 3.7   |
| tN20a-fm38      | AGACATACAAGTCGTAGTGGAAAGTGTCCACCCTAGACAA   | 5                                  | ((((((((.(.)))))..)))((((.(.)))(((((.....)))))) | 18                               | -             |
| tN20a-fm39      | ATCAAAAAGATCGTAGTGGAAACCGTCCACCATAGACTG    | 8                                  | .....((((((((((((((((.....)))))))))..)))))      | 15                               | -             |
| tN20a-fm40      | AGACAAACAGGTCGTAGTGGAAAGTGTCCACCGTGGACCG   | 2                                  | .....((((((((((((((((.....)))))))))..)))))      | 15                               | -             |
| tN20a-fm41      | AGACAAACAGGTAGTGTGGAAAGTGTCCACCGAGACCG     | 4                                  | (((((.(((((((((((((.....)))))))).))))))..)))))  | 4                                | -80.6 ± 7.8   |
| tN20a-fm42      | AGACAAACTGGTCTTTGTGGAAAGTGTCCATCGTAGGCAG   | 6                                  | ((((((((.(.)))))..)))((((.(.)))(((((.....)))))) | 21                               | -             |
| tN20a-fm43      | AGACCAACAGGTCGTATTGTAAAGTGTCCACCGTAGAGCG   | 5                                  | ((((((((((((.(.(((.(.)))))..)))))..)))))        | 2                                | -80.7 ± 11.3  |
| tN20a-fm44      | AAACAAACAGGTCGGAGTGGCAACTTCTGCAGTAGACCT    | 8                                  | .....((((((((((((.....)))))))))..)))))          | 14                               | -             |
| tN20a-fm45      | AGACAAACAGGTCGTAGTTGAAAGTGTCCACCGTATACCG   | 3                                  | ((((((((((((.(.(((.(.)))))..)))))..)))))        | 2                                | -48.5 ± 12.7  |
| tN20a-fm46      | AGACAAACAGGTTGTAGTGGATACTGTCCCGGAGACCG     | 4                                  | ((((((((((((((((((.....)))))))))..)))))         | 4                                | -33.6 ± 12.8  |
| tN20a-fm47      | AGAGAAACAGGTCGTAGTCAAAGTGTCCACCGTAGCCTG    | 5                                  | ((.(.(((.(.(((.(.)))))..)))))..)))))            | 2                                | -51 ± 7.2     |
| tN20a-fm48      | AGTCAGAAAGGCGTAGAGGAAAGTGTCCATCGGAGACCG    | 7                                  | .((((((.(.)))))..)))((((.(.)))(((((.....))))))  | 19                               | -             |
| tN20a-fm49      | AGTCTCACAGTCGTAGTGGAAAGTGCCTCCGTAGACCG     | 6                                  | ((((((((((((((((((.....)))))))))..)))))         | 4                                | -21.2 ± 15.5  |
| tN20a-fm50      | AGACAAATGGGTCGTAGTGGAAAGCGTCCACCGTAGACGG   | 5                                  | ((((((((((((((((((.....)))))))))..)))))         | 8                                | -20.5 ± 11.6  |
| tN20a-sm1       | AGACATACAGTTGGTAGTAAAGTGTCCATCGAAGACCG     | 5                                  | ((((((((((((((((((.....)))))))))..)))))         | 2                                | -25.8 ± 10.5  |
| tN20a-sm2       | AGACATACAGCTGGTAGTGGAAAGTGTCCACCCTAGACCA   | 3                                  | ((((((((((((((((((.....)))))))))..)))))         | 2                                | -31.2 ± 19    |

| Mutated Aptamer | Sequence                                  | Seq. Differences to Parent Aptamer | Secondary Structure                                            | SS Differences to Parent Aptamer | HADDOCK Score |
|-----------------|-------------------------------------------|------------------------------------|----------------------------------------------------------------|----------------------------------|---------------|
| tN20a-sm3       | AGACAGACAGATGCTTGTGAAAACGTTCACCGTAGACCG   | 5                                  | ((((((((((((((((((((((((..))))))))))))))))))                   | 2                                | -55.6 ± 14.2  |
| tN20a-sm4       | AGACATGCAGGTGGTAGTGAAAACGTCCACGATAGACCG   | 3                                  | ((((((((((((((((((((((((..)))))))))))))))))).                  | 4                                | -52.1 ± 12.9  |
| tN20a-sm5       | AGGCATACAAGTGGTAGTGATAACTGTCCACCGTAGACCG  | 3                                  | ((((((((((((((((((((((((..))))))..))))))))))                   | 2                                | -84 ± 11.3    |
| tN20a-sm6       | ACACATACAGGTGGTCCGTGAAAACGTCCAACGTAGACCG  | 4                                  | ..((((((((((((((((((((((..))))))..))))))))..)                  | 4                                | -51 ± 11.1    |
| tN20a-sm7       | AGACATACAGGTGGAACGTGACTGTCCACCGTAGCCCG    | 5                                  | ((((((((((((((((((((((((..))))))))))))))))))                   | 4                                | -64.3 ± 14.5  |
| tN20a-sm8       | AGAAATACAGGTGATAGTGAAAACGTACTACCGTAGCCCG  | 5                                  | ((((((((((((((((((((((((..))))))))))))))))))                   | 2                                | -23.3 ± 3.3   |
| tN20a-sm9       | AGACATACAGGTGGTAGTGAAAACGTGCGACCGCGACCG   | 3                                  | ((((..((((((((((((((((((((((..)))))))))))))))))).              | 4                                | -36.8 ± 8.4   |
| tN20a-sm10      | CGACATACAGGTGGTAGTGAAAACGTCCAACGTAGACCG   | 3                                  | ((((((((((((((((((((((((..))))))..))))))))))                   | 0                                | -68 ± 19.9    |
| tN20a-sm11      | CGACCTAAAGGTGGTAGTGAAAACGTCCAACGTACACCG   | 6                                  | ((((((((..((((((((((((((((((((((..))))))..))))))))))))))       | 2                                | -59.4 ± 6.7   |
| tN20a-sm12      | AGACATACAGGAGCTAGTGAACACTGGCCACCGTAGAACG  | 5                                  | ((((((((((((((((((((((((((..))))))))))))))))))                 | 2                                | -61 ± 17.5    |
| tN20a-sm13      | AGACATAAAGTTGTAGTGAAAACGTCCACCGTAGACCG    | 2                                  | ((((((((..((((((((((((((((((((((..))))))..))))))))))))))       | 2                                | -60.3 ± 11.8  |
| tN20a-sm14      | ACTCATACACGAGGTAGTGAAAAAGCCACCGTAGACCG    | 7                                  | ..(((..(((..((((((((((((((((((((((..))))))))))))))))))..       | 6                                | -91.1 ± 5.5   |
| tN20a-sm15      | AGACCTGCACGTGGTCGTGAGAACTGTCCACCGCGTCCG   | 8                                  | (((((..((((((((((((((((((((((((..)))))))))))))))))).           | 6                                | -60 ± 7.6     |
| tN20a-sm16      | AGACATACAGGCGGTAGTGAAAACCGTCCACCGTAGACCG  | 2                                  | ((((((((((((((((((((((((((..))))))))))))))))))                 | 2                                | -29.7 ± 1.1   |
| tN20a-sm17      | AGACCGACAGGTGGTAGTGACAACGTCCACCATCGACCG   | 5                                  | ((((((((..((((((((((((((((((((((..))))))..))))))))))))))       | 2                                | -56.7 ± 16.1  |
| tN20a-sm18      | AGACATACAGATGGTGGTTAAAACGTCCACCGTAGATCT   | 5                                  | ((((((((((((((((((((((((((..))))))))))))))))))                 | 2                                | -49 ± 9.3     |
| tN20a-sm19      | AGACTTACAGGTGGTAGTGAAAACGTCAACCGTAGACCG   | 2                                  | ((((((((((((((((((((((((((..))))))))))))))))))                 | 2                                | -38.2 ± 8.1   |
| tN20a-sm20      | AGGCAAAACAGGCGCAGTGAAAACCTCCCACCGTAGACTC  | 8                                  | (((((..((((((((((((((((((((((((..)))))))))))))))))).           | 4                                | -44.8 ± 19.8  |
| tN20a-sm21      | AGACAGACAGGCCGTAGTGAGAACTGTCCACCGTTGATCG  | 6                                  | ((((((((((((((((((((((((((..))))))))))))))))))                 | 2                                | -18.6 ± 21.8  |
| tN20a-sm22      | GGACATCCAGGTGGTAGTGAATACTGTCCAGCGCAGCCCG  | 6                                  | ((((((((((((((((((((((((((..)))))))))))))))))).                | 4                                | -23.8 ± 5     |
| tN20a-sm23      | AGACATACACGTGGTGGTAAAACAGTCCACAGTATACCG   | 5                                  | ((((((((((((((((((((((((((..))))))..))))))))))))))             | 2                                | -82.2 ± 12.3  |
| tN20a-sm24      | AGACATACAGGTGGTAGTGAAAAGCTGTCCACTTATAGTCA | 5                                  | ((((((((((((((((((((((((((..))))))))))))))))))                 | 2                                | -27.6 ± 5.8   |
| tN20a-sm25      | AGACATACAGGCGACAGTAAAAGCTGTCCACCGTAGACCG  | 5                                  | ((((((((((((((((((((((((((..))))))))))))))))))                 | 4                                | -15.7 ± 13.1  |
| tN20a-sm26      | AGACAAAACAGGTTCTAGTGAAAACGTCCACCGTAGAGCG  | 4                                  | ..((((((((((((((((((((((..))))))..)))))))((((..))))(((((..)))) | 16                               | -             |
| tN20a-sm27      | AGAGATTCAGGTGCGAGAGAAAACGTCCACCGTAGACCG   | 6                                  | ((..((((((((((((((((((((((((..))))))))))))))))))               | 6                                | -58.3 ± 16.4  |
| tN20a-sm28      | AGACATACAGATGCGAGTGAAAAGCTGCCATCGTAGACCG  | 6                                  | ((((((((((((((((((((((((((..))))))..))))))))))))))             | 2                                | -18.4 ± 6.3   |
| tN20a-sm29      | AGACATACAGGTGGTCTGAATACTATCCACCGTAGACAA   | 6                                  | (((((..(((..((((((((((((((((((((((..)))))))))))))))))).        | 6                                | -45 ± 27.2    |

| Mutated Aptamer | Sequence                                  | Seq. Differences to Parent Aptamer | Secondary Structure                           | SS Differences to Parent Aptamer | HADDOCK Score |
|-----------------|-------------------------------------------|------------------------------------|-----------------------------------------------|----------------------------------|---------------|
| tN20a-sm30      | AGACACACAGGTGGTAGGGAATACTCCCCACCGTAGAGCG  | 6                                  | ((.((((((((((((((((((.))))))))))))))))))      | 4                                | -35.2 ± 10.4  |
| tN20a-sm31      | AGACATATAGGTGGGAGTGAAAATCTCCAGCTGAGACCG   | 6                                  | ((((((((((((.(((((((..)))))))))))))))))).     | 4                                | -26.5 ± 9.8   |
| tN20a-sm32      | AGACATCCAGGTGGTAGTGAAAATTGTACACGGTAGAGCG  | 5                                  | ((((((((((((((((((((..))))))))))))))))))      | 2                                | -11.2 ± 8     |
| tN20a-sm33      | AGACATACAGGGGGTAGTGAAAATGTCCACCGTAGAGCG   | 2                                  | (((((((((((((((((((((((.))))))))))))))))))    | 2                                | -59.5 ± 35.1  |
| tN20a-sm34      | AGACATAAAGGTGGAAGTGAAAGCTGTCCACCGTAGAGCG  | 4                                  | ((.((((((((((((((((((.))))..))))))))))))))    | 4                                | -32.5 ± 3.1   |
| tN20a-sm35      | AGACATACATGTGGTAGTGCAAATGTCCGACCGTCGACCG  | 4                                  | ..((((..)))(((((..)))((((..))..)).            | 16                               | -             |
| tN20a-sm36      | AGAGATACAGGAGGTAGTGACAACTGCCACCGTAAACAG   | 6                                  | (((((((((((((((((((((((.))))))))))))))))))    | 2                                | -15.6 ± 3.6   |
| tN20a-sm37      | AGCCATACTGGGGCAGCGAAAATGTCCACCTTAGACCG    | 6                                  | (((((((((((((((((((((((.))))))))))))))))))    | 2                                | -30.2 ± 14.6  |
| tN20a-sm38      | GGACATACAGGTGGAAGAGAAAACAGTTCACCGTGTACCG  | 6                                  | (((((.(.(.(((((((..)))..)))))))))).           | 6                                | -35.5 ± 21.7  |
| tN20a-sm39      | AGGGTTACAGGTGGAAGTGAAAATGTCCGCGTAGACTG    | 6                                  | ((((((((.(((((((((((..))))..))))))))))))))    | 2                                | -34.6 ± 5.6   |
| tN20a-sm40      | AGACATACAGGTGGTAGTGAAAATGTCCACGCTAGGCAG   | 4                                  | (((((((((((((((((((((((.))))))))))))))))))    | 2                                | -26.7 ± 8.4   |
| tN20a-sm41      | AGACATACACGTCGTTGCGAAAATGTCAACCGTAGACCG   | 5                                  | ..((((..)))((((..)))(((((..))))))             | 22                               | -             |
| tN20a-sm42      | AGACAGTCAGGTGGTTGTGAAAATGTCTACCGTTGACCG   | 5                                  | ..((((((((((((((((((..))..))))..))))))        | 8                                | -50.9 ± 12.5  |
| tN20a-sm43      | AGACATACAGGTGGTAGTGACATCTGTCCATCGTTGACCG  | 4                                  | ((((((((((((.(((((((..)))))))))))))))))).     | 4                                | -30.2 ± 15.9  |
| tN20a-sm44      | TGCCATACAGGTGGTAGTGAAAATGACCTCCGTAGACCG   | 4                                  | ((((((((.(((((((((((..))))..))))))))))))))    | 2                                | -51.3 ± 16.2  |
| tN20a-sm45      | AGAGATATAGGTGTTAGTGAAAATGTCCGTCGTCGACCG   | 7                                  | ((.((((((((((((((((((((((.)))))))))))))))))). | 4                                | -49.3 ± 2.6   |
| tN20a-sm46      | AGACATACAGGGTGTAGTGAAAATGCCCCACCTTAGACCG  | 5                                  | (((((((((((((((((((((((.))))))))))))))))))    | 2                                | -28.7 ± 4.2   |
| tN20a-sm47      | AGCCATACAGGTGGTAGTGAAAATGTTACCGTACACCG    | 4                                  | ..((((((.(((((((((((..))))..))))..))))))      | 6                                | -61.9 ± 11.4  |
| tN20a-sm48      | AGCCATCTGGTGGTAGTAAAAATGTTACAGTAGGCCG     | 7                                  | (((((((((((((((((((((((.))))))))))))))))))    | 2                                | -27.9 ± 5     |
| tN20a-sm49      | AGACATACAGGTGCTAGTGAAAATCCCCACCGAAGACCG   | 4                                  | (((((((((((((((((((((((.))))))))))))))))))    | 2                                | -28.2 ± 11.1  |
| tN20a-sm50      | AGGCATCCAGGTGGAATTGAAAACCGCCCCACCGTAGACCG | 6                                  | (((((((((((((((((((((((.))))))))))))))))))    | 2                                | -11.2 ± 10.1  |

**Table S6.** Visualization and interaction profile of docking complex results.

| Aptamer                    | Visualization                                                                       | HADDOCK Score | Binding Sites Interactions Profile |                                                                                                                             |
|----------------------------|-------------------------------------------------------------------------------------|---------------|------------------------------------|-----------------------------------------------------------------------------------------------------------------------------|
| N20a<br>(72-mer)           | 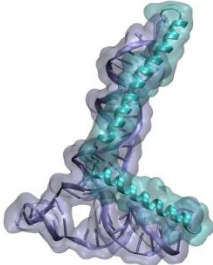   | -68.8 ± 24.1  | <b>6 Hydrophobic Interactions</b>  | Ala9, Glu13, Pro47, Lys66, Tyr70 and Thr71                                                                                  |
|                            |                                                                                     |               | <b>13 Hydrogen Bonds</b>           | Leu3 (2), Gly16, <b>Gln25 (2)</b> , Lys27, Leu28, Gly60, Tyr70, Thr71 (2) and Ala74 (2)                                     |
|                            |                                                                                     |               | <b>1 π-Stacking</b>                | Tyr70                                                                                                                       |
|                            |                                                                                     |               | <b>7 Salt Bridges</b>              | <b>Arg21 (2)</b> , <b>Arg46</b> , Lys52 (2) and Lys66 (2)                                                                   |
| tN20a<br>(40-mer)          |    | -80.8 ± 24.1  | <b>4 Hydrophobic Interactions</b>  | Leu28, Thr36, Thr58 and Arg65                                                                                               |
|                            |                                                                                     |               | <b>16 Hydrogen Bonds</b>           | Ser10, <b>Arg21 (3)</b> , Asn22, <b>Gln25</b> , Gln32, Gln35, Gln42, Ser44 (2), Val50, Arg54 (2) and Arg65 (2)              |
|                            |                                                                                     |               | <b>10 Salt Bridges</b>             | <b>Arg21 (3)</b> , Glu39, <b>Arg46 (2)</b> , Arg54, Arg62, Arg65 and Lys66                                                  |
| tN20a-<br>fm32<br>(40-mer) |   | -86.4 ± 15.2  | <b>18 Hydrogen Bonds</b>           | His1, Ser10, Glu13 (3), Thr14, Gln18 (2), <b>Arg21 (2)</b> , Asn22 (2), <b>Gln25</b> , Gln32, Thr36, Ser53, Ala57 and Arg65 |
|                            |                                                                                     |               | <b>5 Salt Bridges</b>              | <b>Arg21</b> , <b>Arg46</b> , Lys52, Arg54 and His64                                                                        |
| tN20a-<br>sm14<br>(40-mer) |  | -91.1 ± 5.5   | <b>2 Hydrophobic Interactions</b>  | <b>Gln25</b> and Leu28                                                                                                      |
|                            |                                                                                     |               | <b>16 Hydrogen Bonds</b>           | His1, Leu12, Gly16, Leu17, <b>Gln25 (2)</b> , Ser29, Gln32 (2), Thr36, Ser37 (2), Ala57, Arg65 (2) and Arg73                |
|                            |                                                                                     |               | <b>1 π-Cation Interaction</b>      | Arg65                                                                                                                       |
|                            |                                                                                     |               | <b>8 Salt Bridges</b>              | <b>Arg21 (2)</b> , His23, Lys27, <b>Arg46</b> , Arg54, Arg62 and His64                                                      |
